# Supplementary material for: The solution properties of galactomannan after simulated digestion of guar fortified bread predict the extent of postprandial insulin reduction in healthy adult overweight subjects
Source: Royal Society of Chemistry journal article supplement (doi:10.1039/d2fo01762h), 2022-01-01
Supplement: d2fo01762h1.pdf [file d2fo01762h1.pdf]

## Enrolment

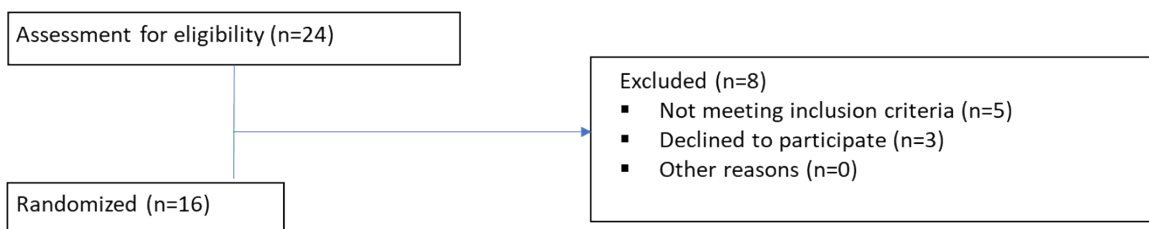

## Allocation

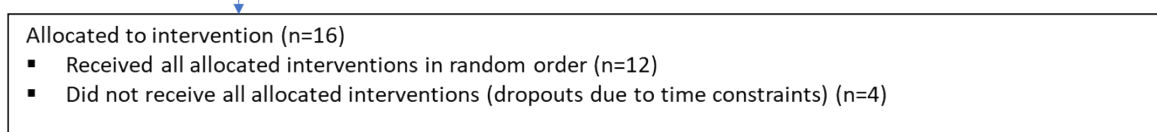

## Analysis

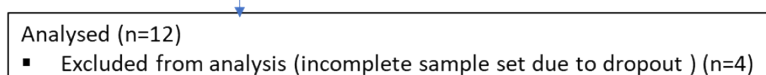

**Supplementary Figure 1** Consolidated Standards of Reporting Trials (CONSORT) flow diagram

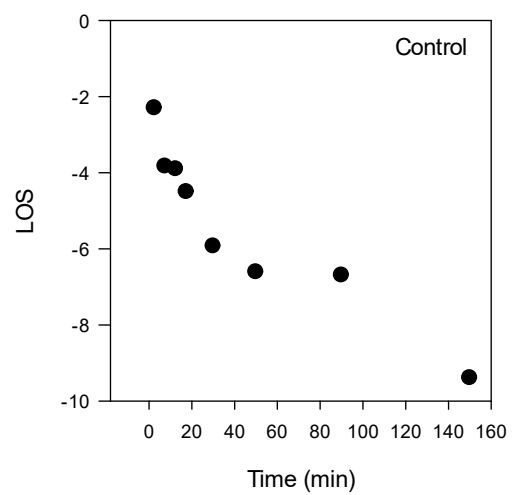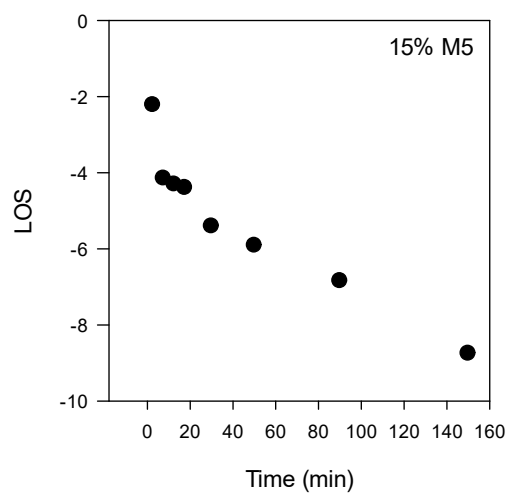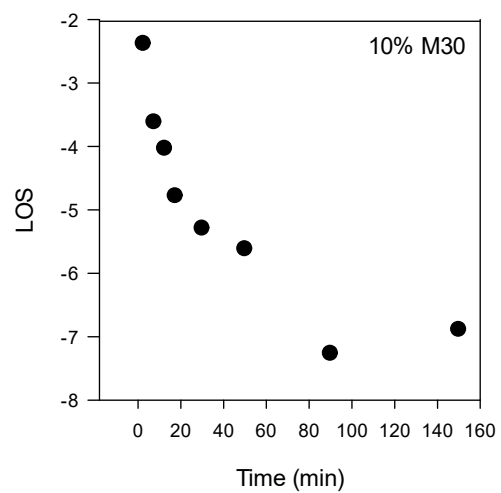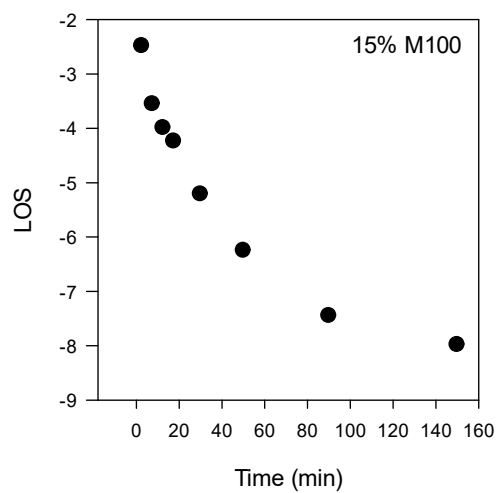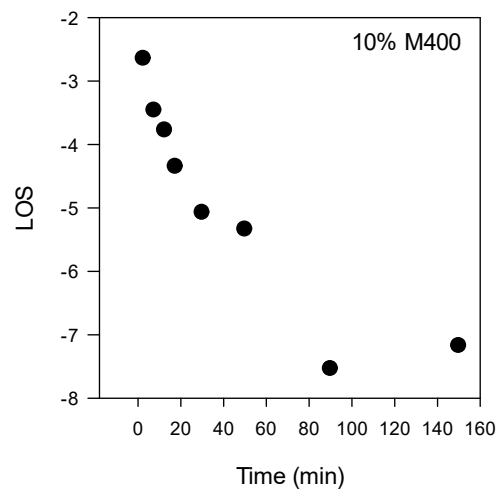

**Supplementary Figure 2.** Logarithm of slope (LOS) plots of *in vitro* digestion of starch in the guar fortified test breads. Text labels in each figure represent the wheat flour replacement level by the different guar grades.
